# Supplementary material for: Oxidative reactivity of Cu–TESHHK– and its alanine analogues
Source: Royal Society of Chemistry journal article supplement (doi:10.1039/b502920a), 2005-01-01
Supplement: b502920a.pdf [file b502920a.pdf]

## Figures

**Figure S1.** The differential spectra accompanying the formation of a Cu(III) species from Cu(II)-TESHHK- complexes (0.5 mM) upon the addition of 1 mM H<sub>2</sub>O<sub>2</sub> at pH 7.4 (50 mM phosphate buffer) and 37 °C. The first spectrum was recorded at 0.5 min after the H<sub>2</sub>O<sub>2</sub> addition, and the following ones in 2 min. intervals.

**Figure S2.** The differential spectra accompanying the formation of a Cu(III) species from Cu(II)-TASHHK- complexes (0.5 mM) upon the addition of 1 mM H<sub>2</sub>O<sub>2</sub> at pH 7.4 (50 mM phosphate buffer) and 37 °C. The first spectrum was recorded at 0.5 min after the H<sub>2</sub>O<sub>2</sub> addition, and the following ones in 2 min. intervals.

**Figure S3.** The differential spectra accompanying the formation of a Cu(III) species from Cu(II)-TESAHK- complexes (0.5 mM) upon the addition of 1 mM H<sub>2</sub>O<sub>2</sub> at pH 7.4 (50 mM phosphate buffer) and 37 °C. The first spectrum was recorded at 0.5 min after the H<sub>2</sub>O<sub>2</sub> addition, and the following ones in 2 min. intervals.

**Figure S4.** The differential spectra accompanying the formation of a Cu(III) species from Cu(II)-TESHAK- complexes (0.5 mM) upon the addition of 1 mM H<sub>2</sub>O<sub>2</sub> at pH 7.4 (50 mM phosphate buffer) and 37 °C. The first spectrum was recorded at 0.5 min after the H<sub>2</sub>O<sub>2</sub> addition, and the following ones in 2 min. intervals.

**Figure S5.** Species distribution for Cu(II)-TESHHK- complexes, calculated for reagent concentrations used in kinetics measurements, using the binding constants published previously.<sup>3,4</sup> The pseudo-first-order rate constants for HO• *k* (!) are overlaid. The reaction mixture was incubated at 37 °C and contained: Cu(II)-TESHHK- (0.5 mM), H<sub>2</sub>O<sub>2</sub> (1 mM), NDMA (2.5 × 10<sup>-5</sup> M), phosphate buffer (50 mM, pH 7.4).

**Figure S6.** Species distribution for Cu(II)-TASHHK- complexes, calculated for reagent

concentrations used in kinetics measurements, using the binding constants published previously.<sup>3,4</sup> The pseudo-first-order rate constants for HO•  $k$  (!) are overlaid. The reaction mixture was incubated at 37 °C and contained: Cu(II)-TASHHK- (0.5 mM), H<sub>2</sub>O<sub>2</sub> (1 mM), NDMA (2.5 × 10<sup>-5</sup> M), phosphate buffer (50 mM, pH 7.4).

**Figure S7.** Species distribution for Cu(II)-TESAHK- complexes, calculated for reagent concentrations used in kinetics measurements, using the binding constants published previously.<sup>3,4</sup> The pseudo-first-order rate constants for HO•  $k$  (!) are overlaid. The reaction mixture was incubated at 37 °C and contained: Cu(II)-TESAHK- (0.5 mM), H<sub>2</sub>O<sub>2</sub> (1 mM), NDMA (2.5 × 10<sup>-5</sup> M), phosphate buffer (50 mM, pH 7.4).

**Figure S6.** Species distribution for Cu(II)-TESHAK- complexes, calculated for reagent concentrations used in kinetics measurements, using the binding constants published previously.<sup>3,4</sup> The pseudo-first-order rate constants for HO•  $k$  (!) are overlaid. The reaction mixture was incubated at 37 °C and contained: Cu(II)-TESHAK- (0.5 mM), H<sub>2</sub>O<sub>2</sub> (1 mM), NDMA (2.5 × 10<sup>-5</sup> M), phosphate buffer (50 mM, pH 7.4).

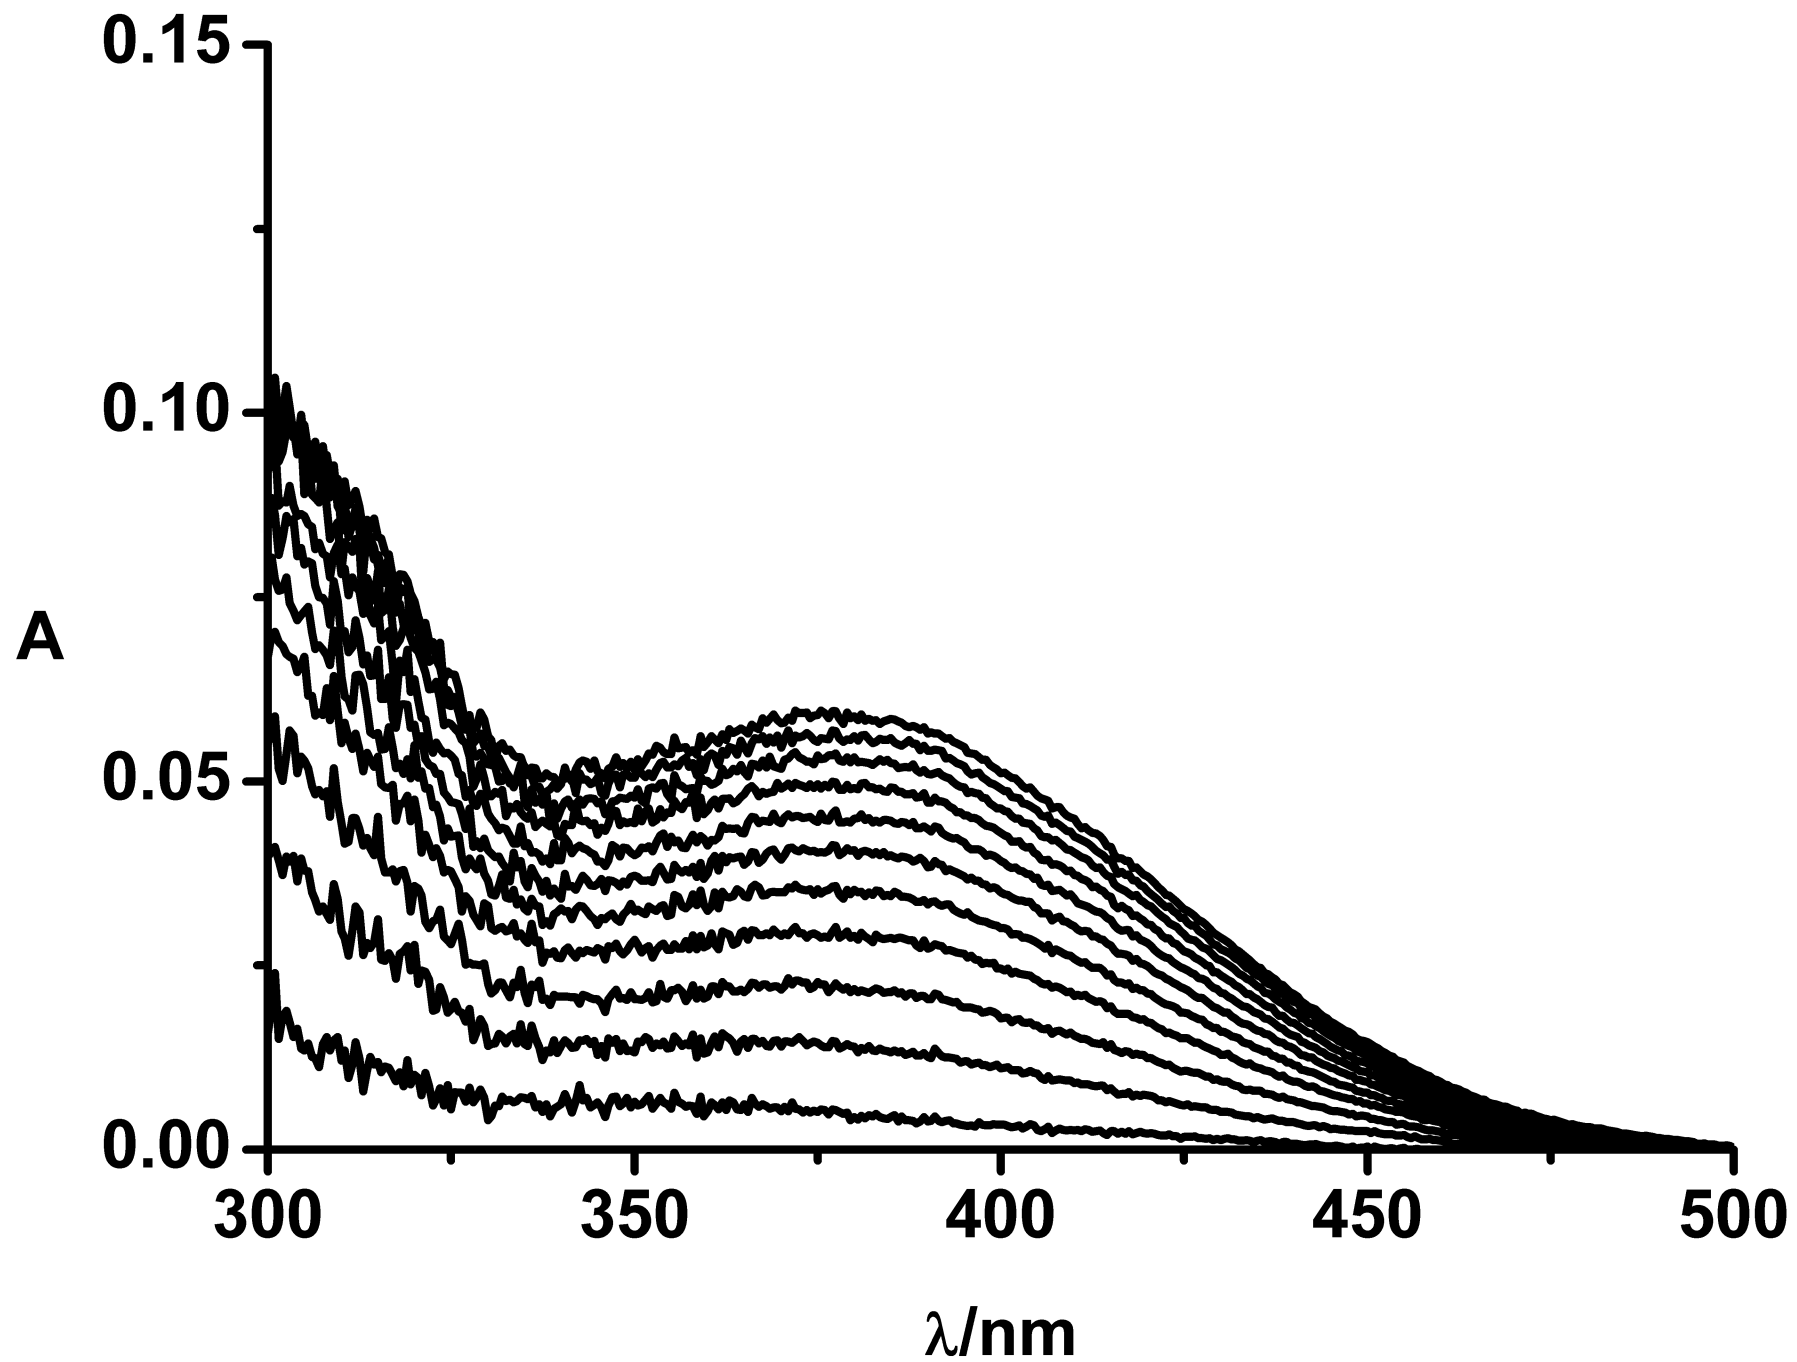



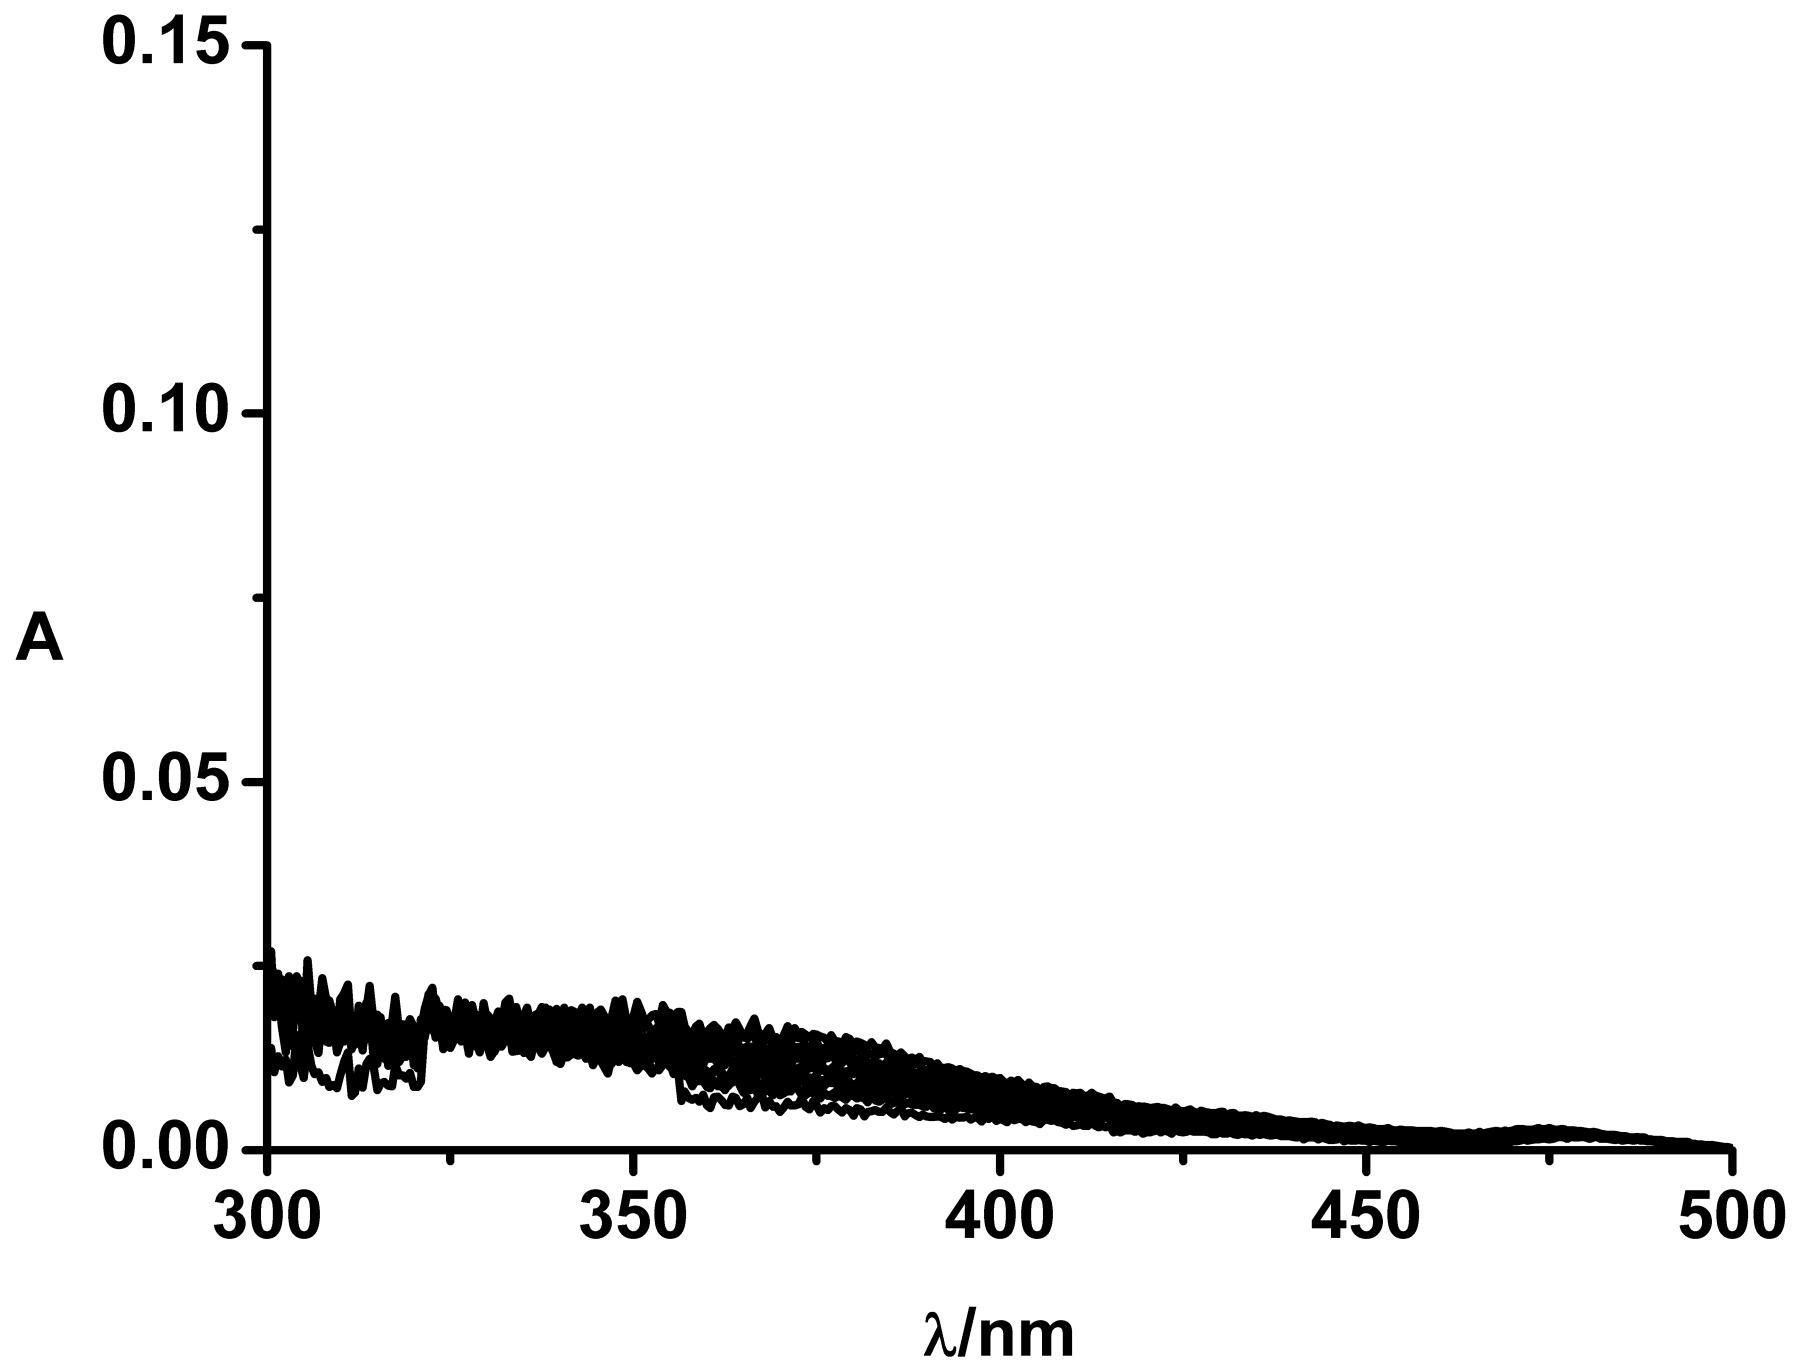

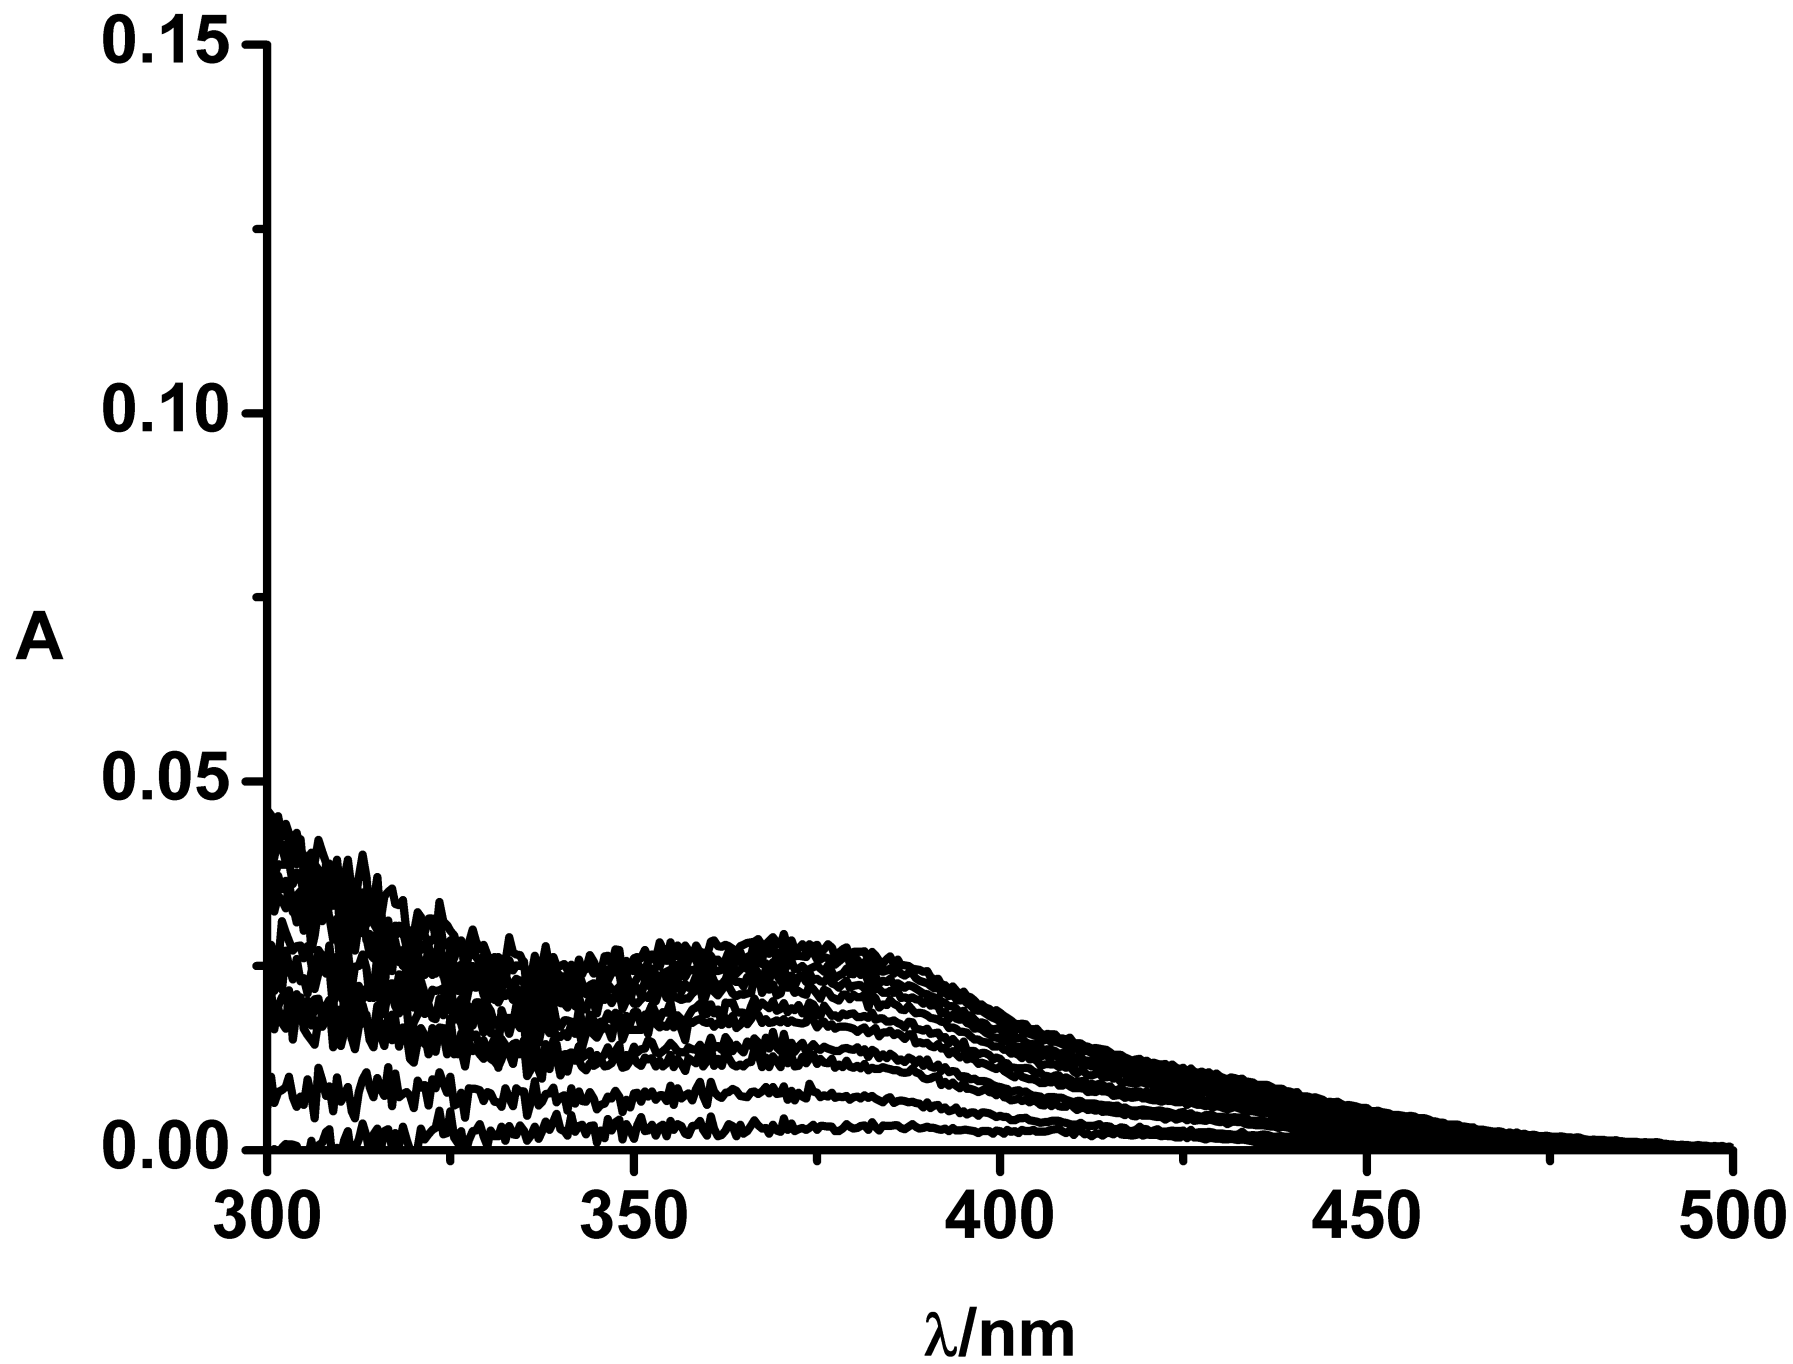

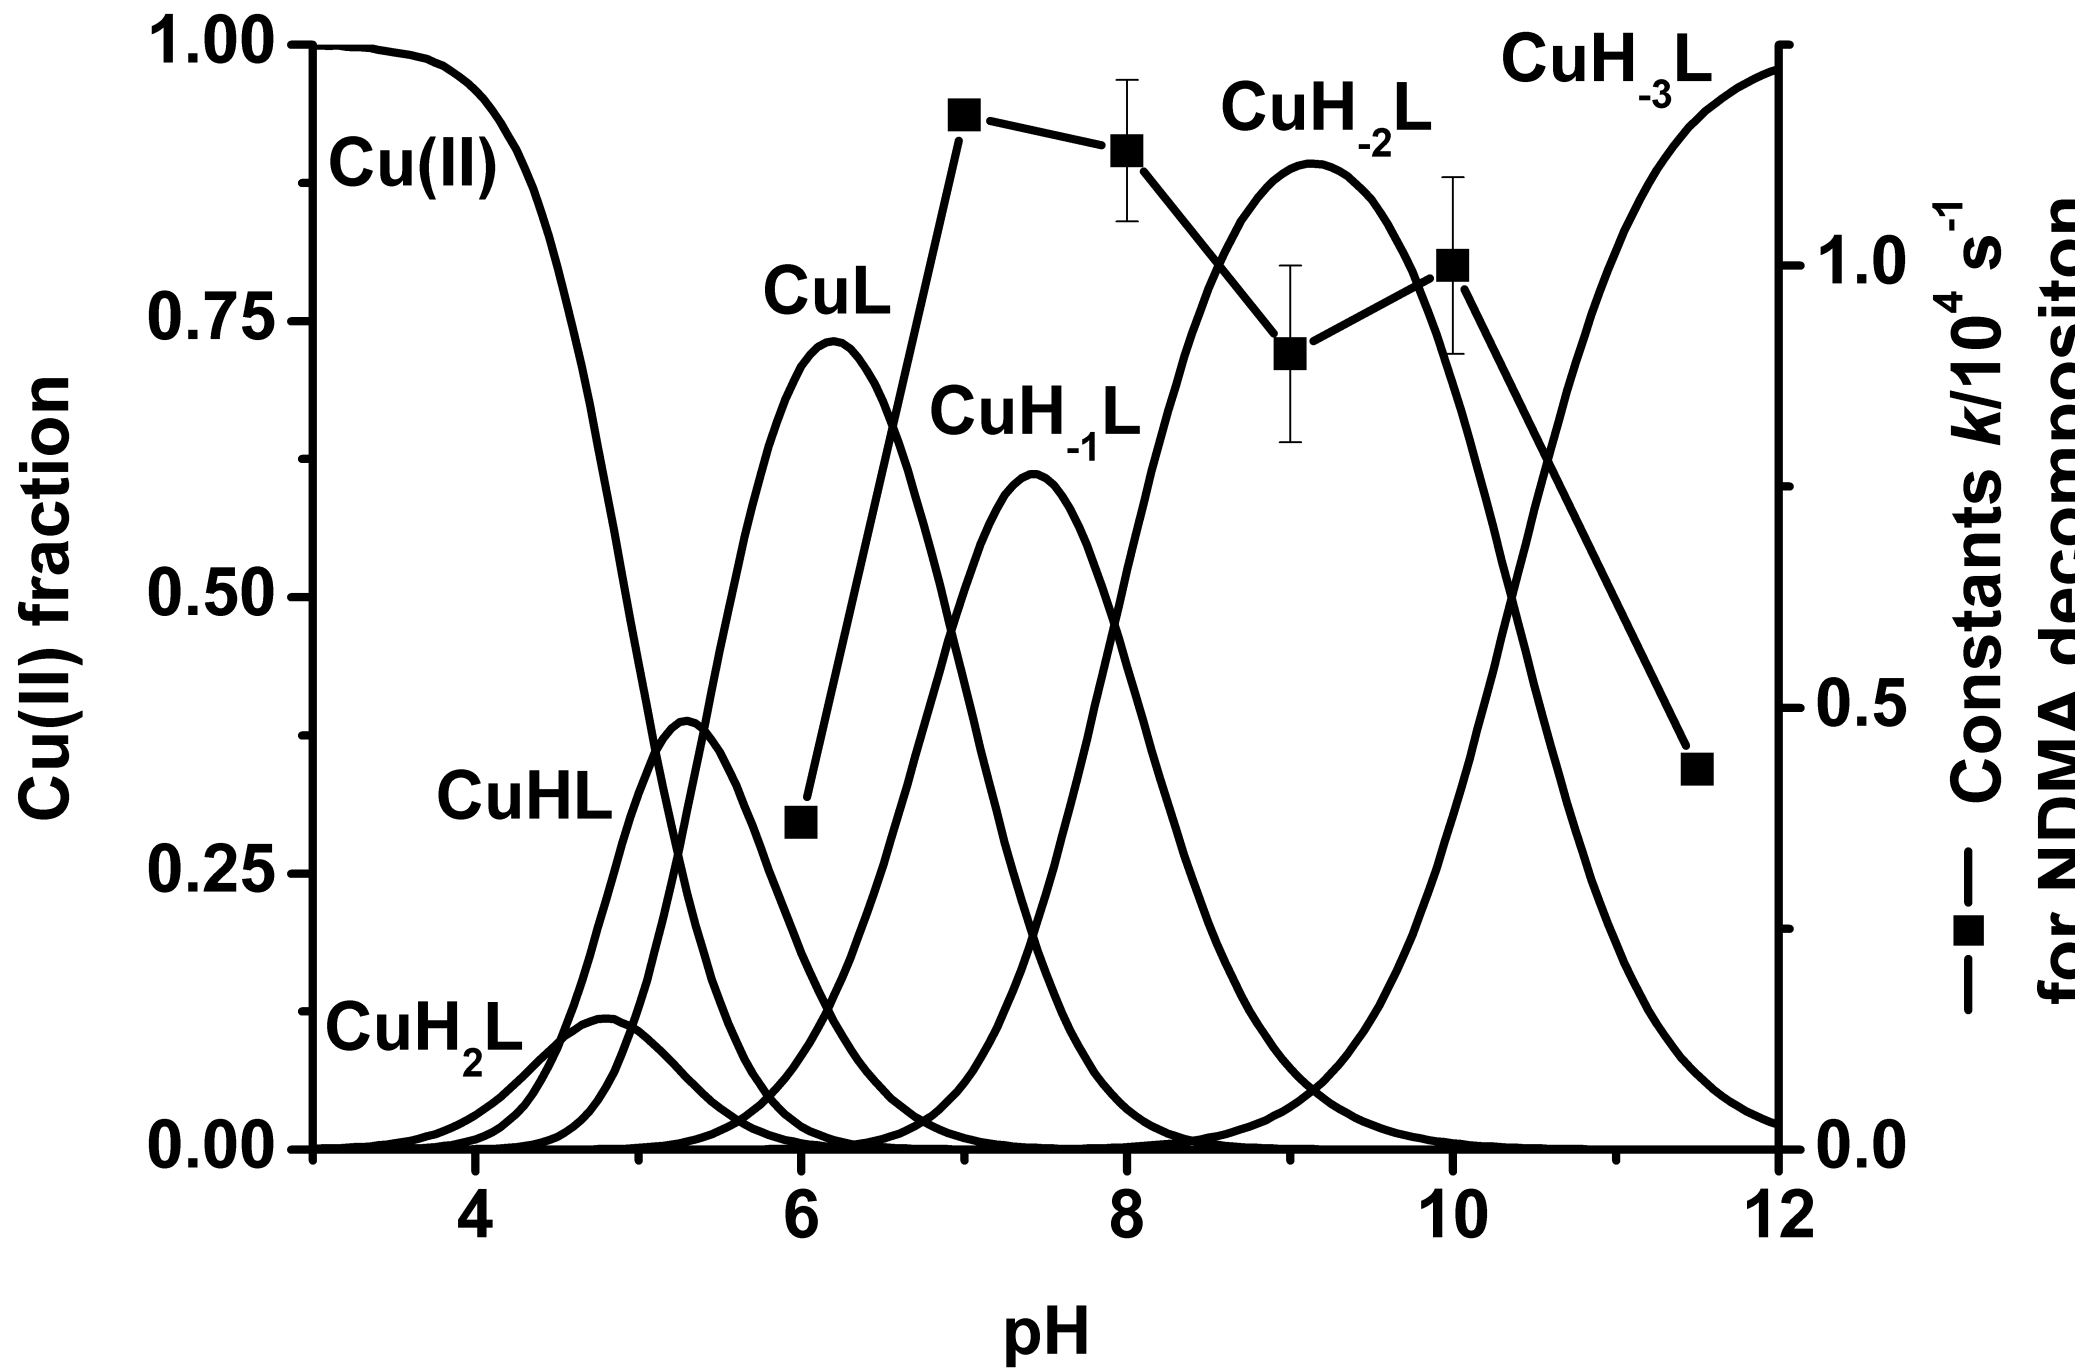





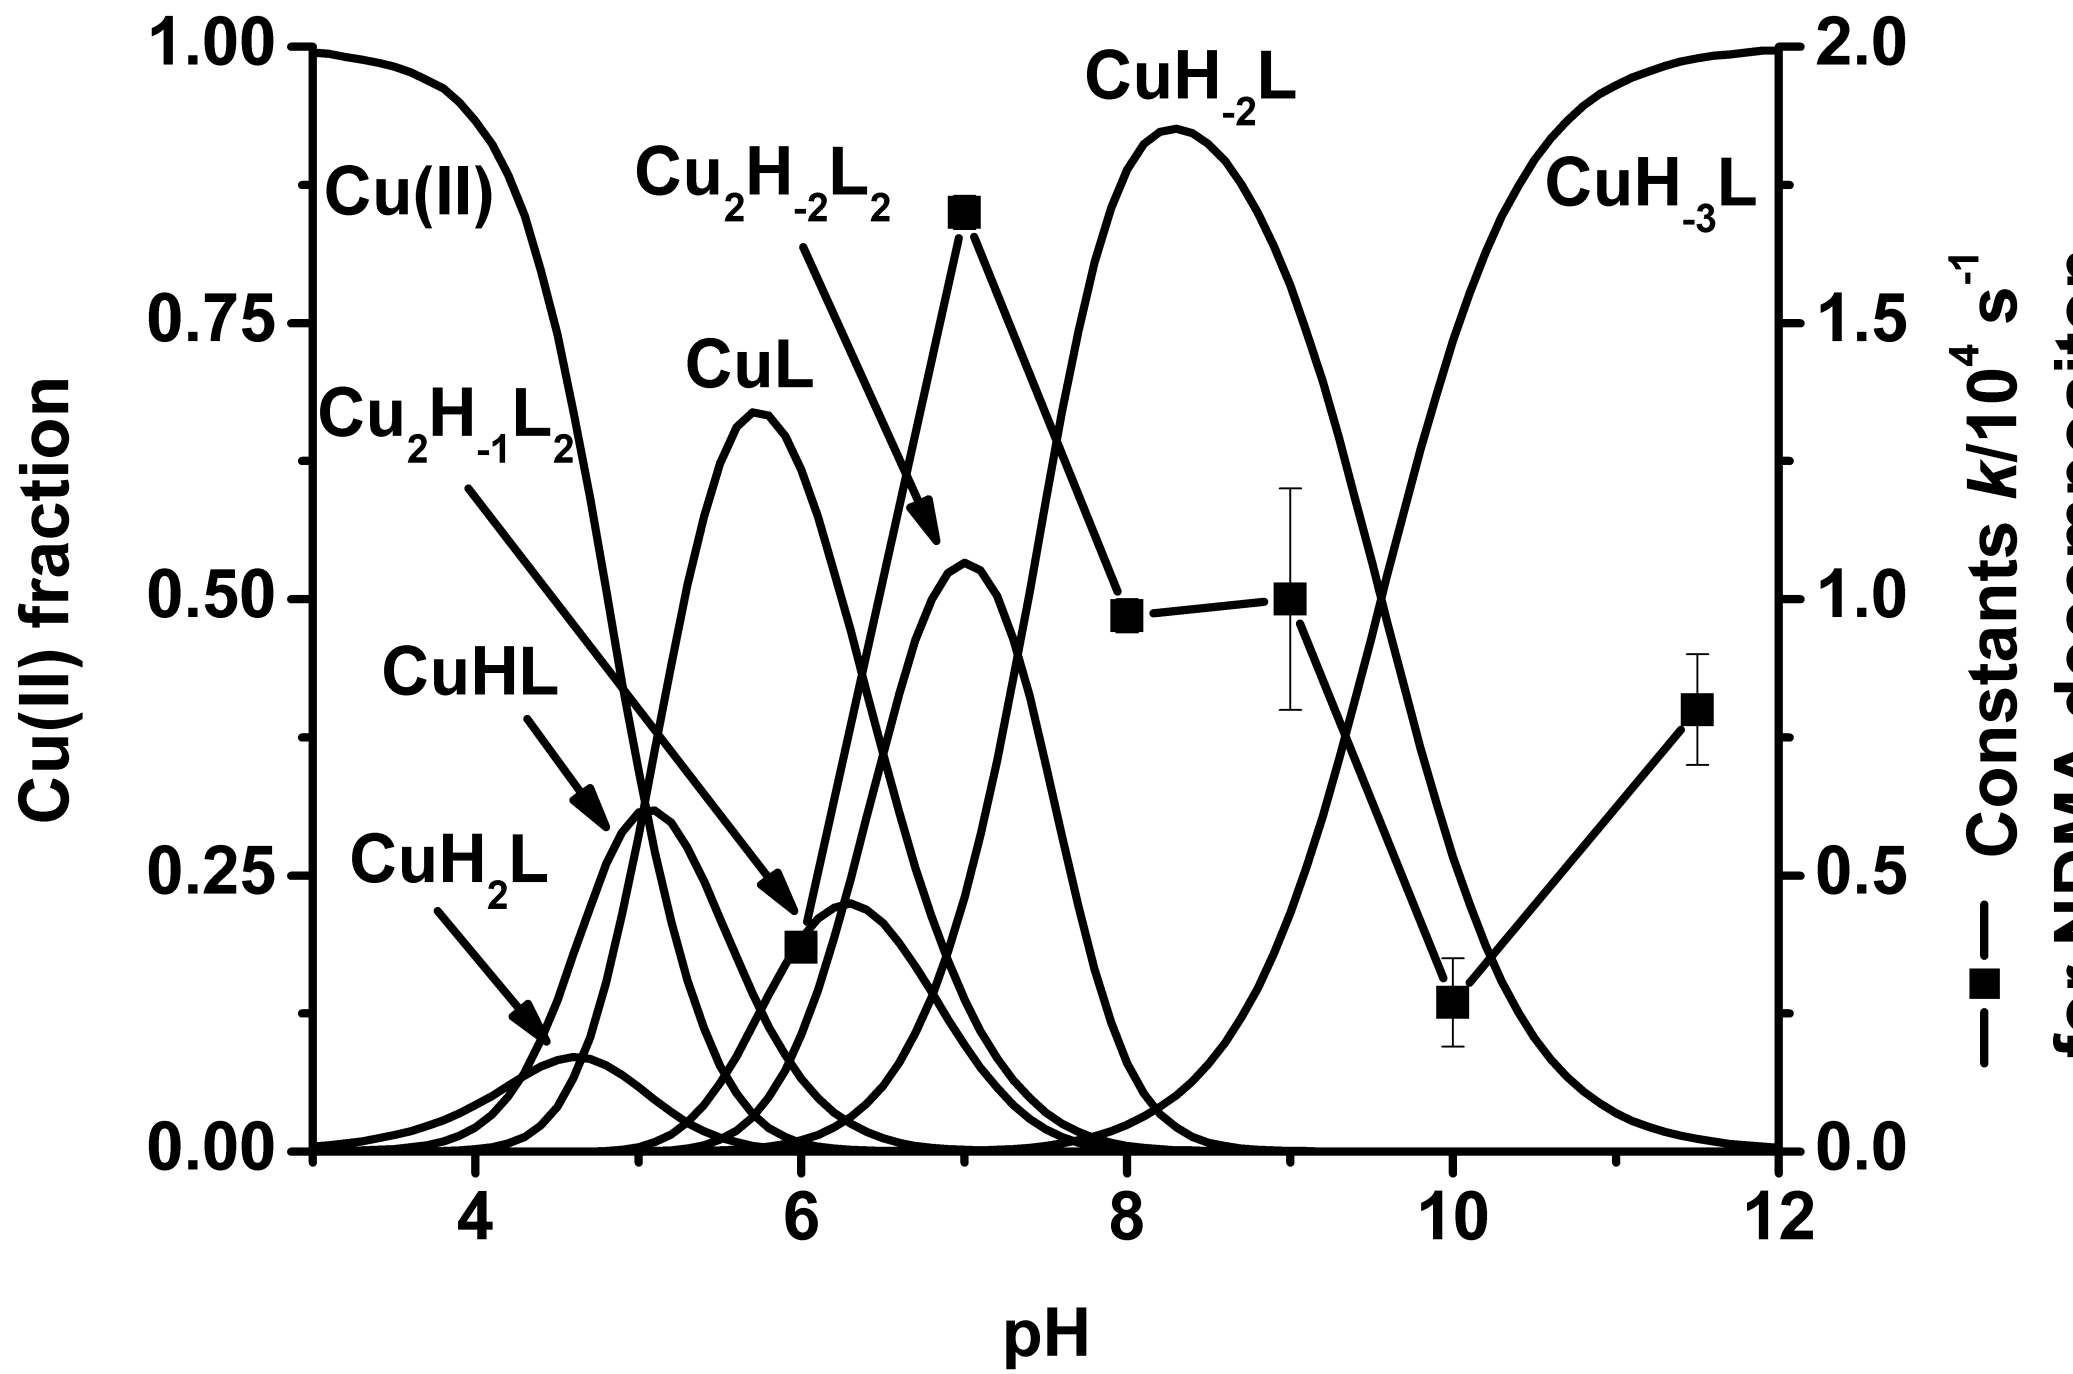

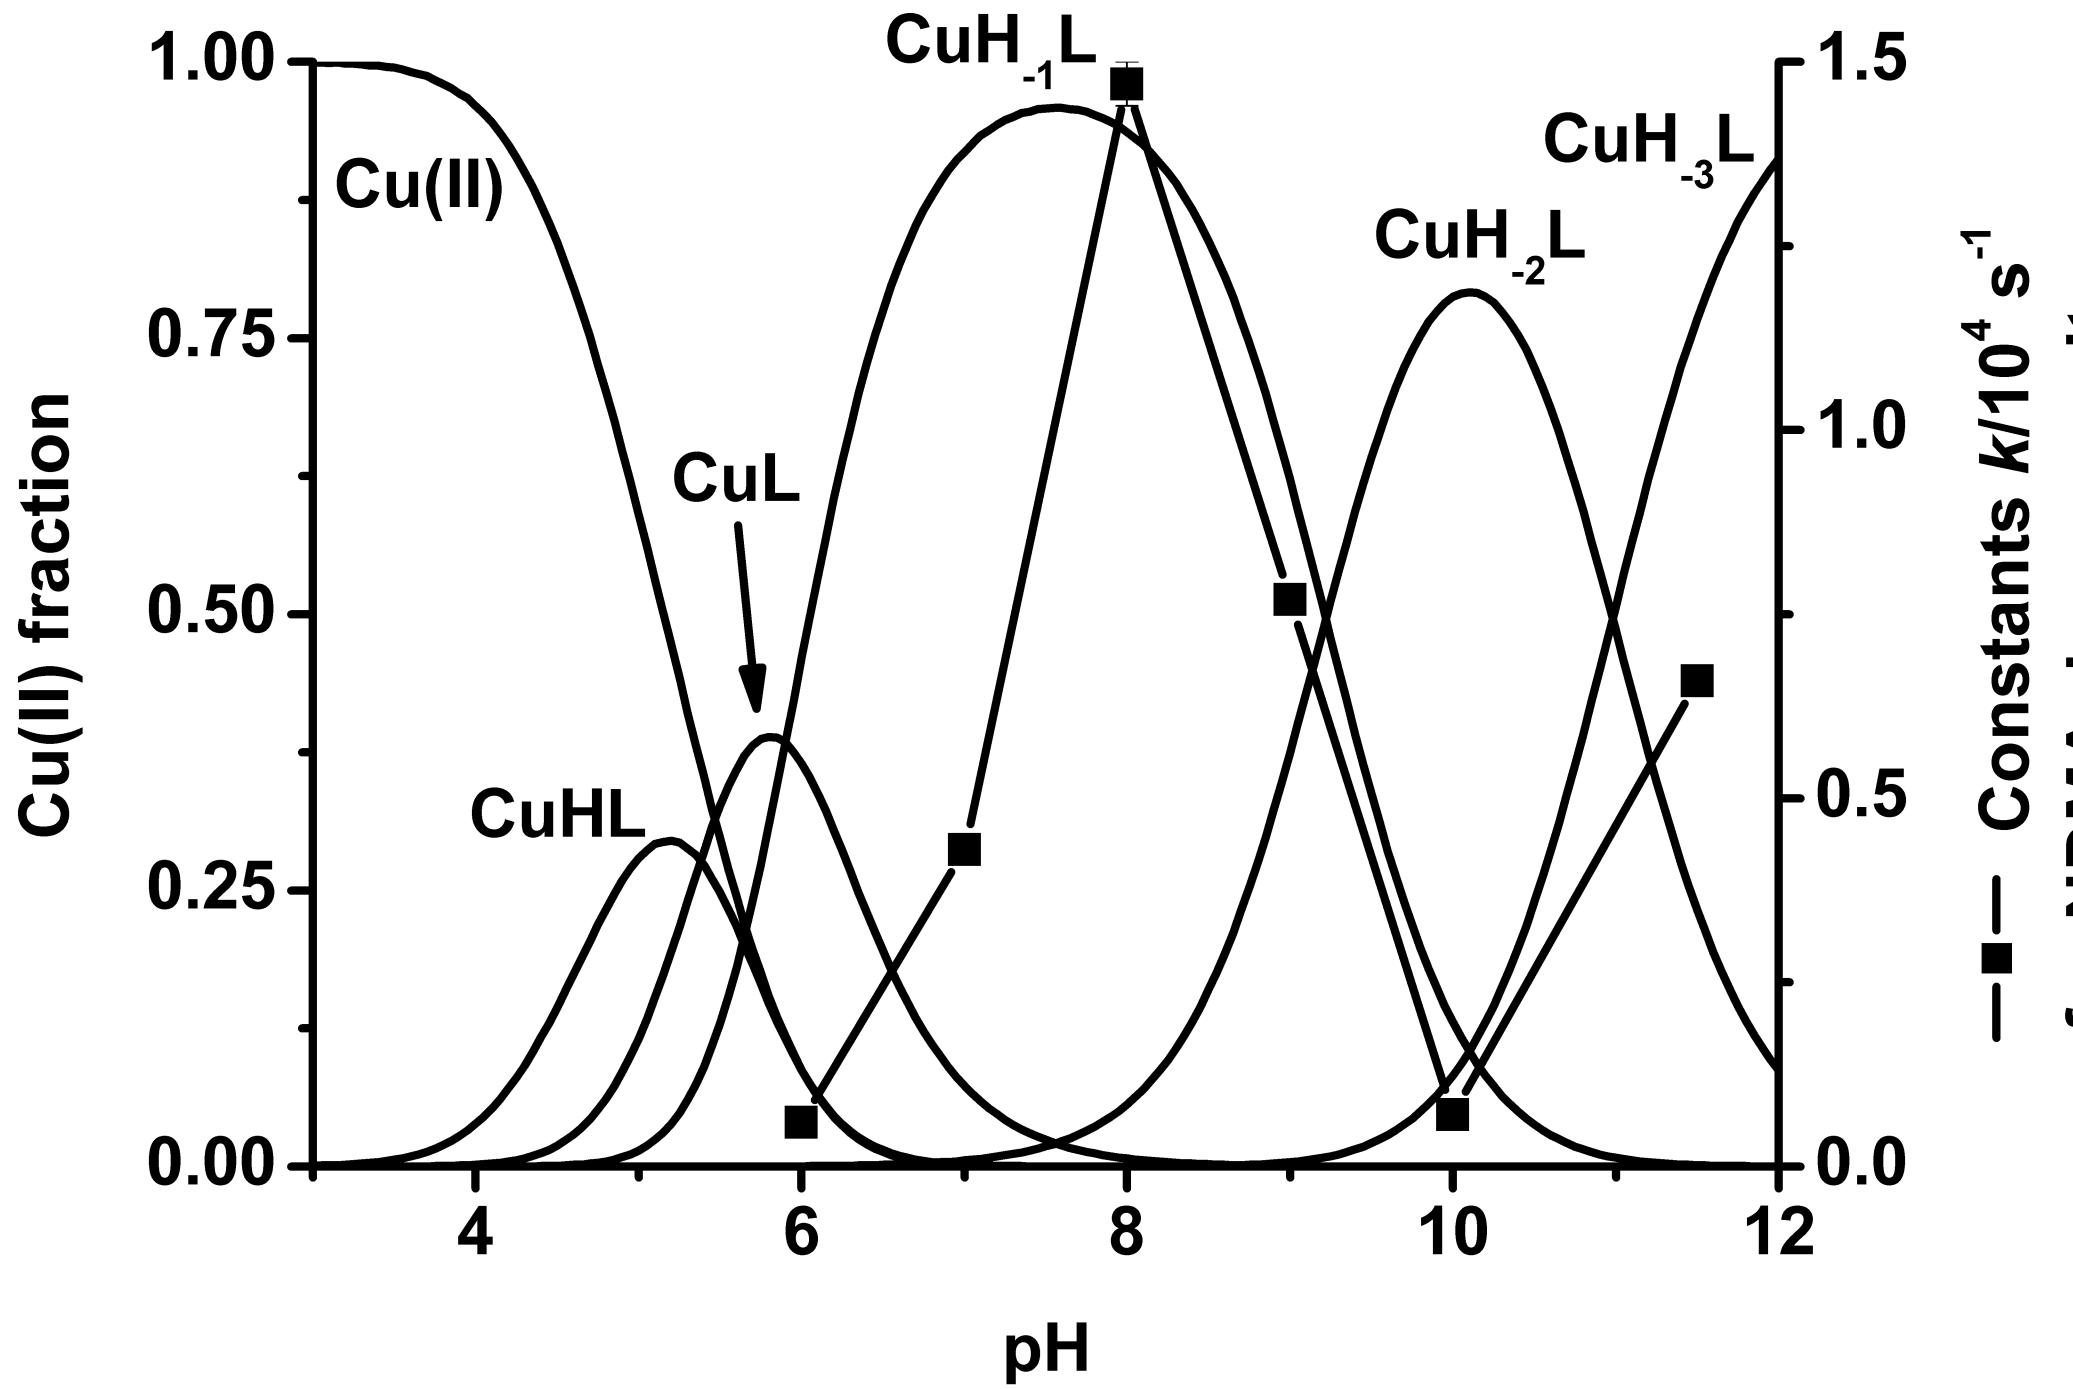

**Tables**

**Table S1.** Linear correlation between the positions of reduction peaks and the pH of the samples.

| peptide  | intercept | slope     | R parameter |
|----------|-----------|-----------|-------------|
| -TESHHK- | -0.98(4)  | -0.023(5) | 0.94379     |
|          | -0.18(9)  | -0.05(1)  | 0.89137     |
| -TASHHK- | -0.98(4)  | -0.025(5) | 0.94191     |
|          | 0.02(9)   | -0.06(1)  | 0.90021     |
| -TEAHHK- | -1.00(2)  | -0.018(2) | 0.97984     |
|          | -0.36(4)  | -0.022(5) | 0.92079     |
| -TESAHK- | -0.9(2)   | -0.03(2)  | 0.62058     |
|          | -0.2(1)   | -0.05(1)  | 0.88746     |
| -TESHAK- | -0.50(4)  | -0.008(4) | 0.82034     |
|          | 0.22(8)   | -0.103(9) | 0.99248     |
